# Supplementary material for: The first observation of the [Cp3Mn]– anion; structures of hexagonal [(η2-Cp)3MnK·1.5thf] and ion-separated [(η2-Cp)3Mn]2[Mg(thf)6]·2thf
Source: Royal Society of Chemistry journal article supplement (doi:10.1039/b106366a), 2001-01-01
Supplement: b106366a(fig).doc [file b106366a%28fig%29.doc]

The static disordering arising from superimposition of the two types of sheet of [(2-Cp)3MnK1.5thf] **1**. H-atoms and thf ligands have been removed for clarity.
